# Supplementary material
Source: PubMed Central journal article supplement (PMC5647227)
Supplement: NIHMS892779-supplement-Supplemental_Information.pdf [file NIHMS892779-supplement-Supplemental_Information.pdf]

## Supporting Information

### **Analgesic properties of opioid/NK1 multitarget ligands with distinct *in vitro* profiles in naive and chronic constriction injury (CCI)-mice**

Joanna Starnowska,<sup>†</sup> Roberto Costante,<sup>‡,§</sup> Karel Guillemyn,<sup>‡</sup> Katarzyna Popiolek-Barczyk,<sup>†</sup> Nga N. Chung,<sup>‡</sup> Carole Lemieux,<sup>‡</sup> Attila Keresztes,<sup>§</sup> Joost Van Duppen,<sup>¶</sup> Adriano Mollica,<sup>◇</sup> John Streicher,<sup>§</sup> Jozef Vanden Broeck,<sup>¶</sup> Peter W. Schiller,<sup>‡</sup> Dirk Tourwé,<sup>‡</sup> Joanna Mika,<sup>†</sup> Steven Ballet,<sup>‡\*</sup> Barbara Przewlocka<sup>†\*</sup>

<sup>†</sup> *Institute of Pharmacology, Department of Pain Pharmacology, Krakow, Poland*

<sup>‡</sup> *Research Group of Organic Chemistry, Vrije Universiteit Brussel, Brussels, Belgium,*

<sup>‡</sup> *Department of Chemical Biology and Peptide Research, Clinical Research Institute of Montreal, Montreal, Canada,*

<sup>§</sup> *Department of Pharmacology, College of Medicine, University of Arizona, Tucson, AZ, U.S.A.*

<sup>¶</sup> *Animal Physiology and Neurobiology, Zoological Institute, Katholieke Universiteit Leuven, Leuven, Belgium.*

<sup>◇</sup> *Department of Pharmacy, “G. d’Annunzio” University, Chieti, Italy*

<sup>\*</sup> *Present address: IRBM Science Park s.p.a., Pomezia (RM), Italy*

#### **Compound characterization**

*H-Dmt-D-Arg-Ab-Gly-NMe-3',5'-(CF<sub>3</sub>)<sub>2</sub>-Bn (3, SBCHM1)*. Preparative HPLC yielded the desired compound (white powder, 34%). HPLC:  $t_R = 14.0$  min. TLC  $R_f$  0.72 (EBAW). HRMS (ESP<sup>+</sup>) found  $m/z$  821.3536 [M + H]<sup>+</sup>, [C<sub>39</sub>H<sub>46</sub>F<sub>6</sub>N<sub>8</sub>O<sub>5</sub> + H<sup>+</sup>] requires 821.3568.

*H-Dmt-D-Arg-Ab-β-Ala-NMe-Bn (4, KGCHM2)*. Preparative HPLC yielded the desired compound (white powder, 34%). HPLC:  $t_R = 11.7$  min. TLC  $R_f$  0.64 (EBAW). HRMS (ESP<sup>+</sup>) found  $m/z$  699.3955 [M + H]<sup>+</sup>, [C<sub>38</sub>H<sub>50</sub>N<sub>8</sub>O<sub>5</sub> + H<sup>+</sup>] requires 699.3977.

*H-Dmt-D-Arg-Ab-Gly-NH<sub>2</sub> (1 (AN81))*. Preparative HPLC yielded the desired compound (white powder). HPLC:  $t_R = 8.6$  min. TLC  $R_f$  0.55 (EBAW). HRMS (ESP<sup>+</sup>) found  $m/z$  581.3220 [M + H]<sup>+</sup>, [C<sub>29</sub>H<sub>40</sub>N<sub>8</sub>O<sub>5</sub> + H<sup>+</sup>] requires 581.3195.<sup>56</sup>

*H-Dmt-D-Arg-Aba-β-Ala-NH<sub>2</sub>* (**2**, **KGOP01**). Preparative HPLC yielded the desired compound (white powder, 49.5%). HPLC:  $t_R = 10.1$  min. TLC  $R_f$  0.44 (EBAW). HRMS (ESP<sup>+</sup>) found  $m/z$  595.3394 [M+H]<sup>+</sup>, [C<sub>30</sub>H<sub>43</sub>N<sub>8</sub>O<sub>5</sub> + H<sup>+</sup>] requires 595.3351.<sup>22</sup>

*H-Dmt-D-Arg-Aba-β-Ala-NcPr-3'-5'-(CF<sub>3</sub>)<sub>2</sub>-Bn* (**6**, **RCCHM1**). Preparative HPLC yielded the desired compound (white powder, 7%). HPLC:  $t_R = 14.7$  min. TLC  $R_f$  0.78 (EBAW). HRMS (ESP<sup>+</sup>) found  $m/z$  861.3876 [M + H]<sup>+</sup>, [C<sub>42</sub>H<sub>50</sub>F<sub>6</sub>N<sub>8</sub>O<sub>5</sub> + H<sup>+</sup>] requires 861.3881.

*H-Dmt-D-Arg-Aba-β-Ala-NcPr-Bn* (**7**, **RCCHM2**). Preparative HPLC yielded the desired compound (white powder, 20%). HPLC:  $t_R = 12.5$  min. TLC  $R_f$  0.76 (EBAW). HRMS (ESP<sup>+</sup>) found  $m/z$  725.4151 [M + H]<sup>+</sup>, [C<sub>40</sub>H<sub>52</sub>N<sub>8</sub>O<sub>5</sub> + H<sup>+</sup>] requires 725.4133.

*H-Dmt-D-Arg-Aba-Gly-NcPr-Bn* (**8**, **RCCHM8**). Preparative HPLC yielded the desired compound (white powder, 9%). HPLC:  $t_R = 12.5$  min. TLC  $R_f$  0.81 (EBAW). HRMS (ESP<sup>+</sup>) found  $m/z$  711.3972 [M + H]<sup>+</sup>, [C<sub>39</sub>H<sub>50</sub>N<sub>8</sub>O<sub>5</sub> + H<sup>+</sup>] requires 711.3977.

*H-Dmt-D-Arg-Aba-β-Ala-isoindoline* (**9**, **RCCHM4**). Preparative HPLC yielded the desired compound (white powder, 23%). HPLC:  $t_R = 11.2$  min. TLC  $R_f$  0.71 (EBAW). HRMS (ESP<sup>+</sup>) found  $m/z$  697.3843 [M + H]<sup>+</sup>, [C<sub>38</sub>H<sub>48</sub>N<sub>8</sub>O<sub>5</sub> + H<sup>+</sup>] requires 697.3820.

*H-Dmt-D-Arg-Aba-Gly-isoindoline* (**10**, **RCCHM5**). Preparative HPLC yielded the desired compound (white powder, 16%). HPLC:  $t_R = 11.6$  min. TLC  $R_f$  0.76 (EBAW). HRMS (ESP<sup>+</sup>) found  $m/z$  683.3673 [M + H]<sup>+</sup>, [C<sub>37</sub>H<sub>46</sub>N<sub>8</sub>O<sub>5</sub> + H<sup>+</sup>] requires 683.3664.

*H-Dmt-D-Arg-Aba-Gly-NMe-2'-OMe-Bn* (**11**, **RCCHM7**). Preparative HPLC yielded the desired compound (white powder, 29%). HPLC:  $t_R = 11.9$  min. TLC  $R_f$  0.73 (EBAW). HRMS (ESP<sup>+</sup>) found  $m/z$  729.4109 [M + H]<sup>+</sup>, [C<sub>41</sub>H<sub>50</sub>N<sub>8</sub>O<sub>5</sub> + H<sup>+</sup>] requires 729.4083.

*H-Dmt-D-Arg-Aba-β-Ala-NMe-2'-naphthyl* (**12**, **RCCHM3**). Preparative HPLC yielded the desired compound (white powder, 20%). HPLC:  $t_R = 13.2$  min. TLC  $R_f$  0.77 (EBAW). HRMS (ESP<sup>+</sup>) found  $m/z$  749.4146 [M + H]<sup>+</sup>, [C<sub>42</sub>H<sub>52</sub>N<sub>8</sub>O<sub>5</sub> + H<sup>+</sup>] requires 749.4133.

*H-Dmt-D-Arg-Aba-Gly-NMe-2'-naphthyl* (**13**, **RCCHM6**). Preparative HPLC yielded the desired compound (white powder, 21%). HPLC:  $t_R = 13.0$  min. TLC  $R_f$  0.80 (EBAW). HRMS (ESP<sup>+</sup>) found  $m/z$  735.3989 [M + H]<sup>+</sup>, [C<sub>41</sub>H<sub>50</sub>N<sub>8</sub>O<sub>5</sub> + H<sup>+</sup>] requires 735.3977.

## Synthesis of benzylamine derivates

### Synthesis of *N*-methyl-1-(naphthalen-2-yl)methanamine

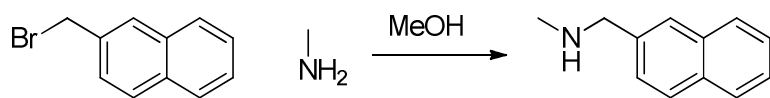

A 40 % solution of methylamine in water (1.78 g, 22.9 mmol, 10.14 equiv.) was dissolved in 10 ml of methanol in a two-headed round bottom flask which was equipped with a stirbar, a cooler and an oil bath. The mixture was heated to 50°C and a solution of 2-(bromomethyl)naphthalane (0.5 g, 2.26 mmol, 1 equiv.) in methanol (5 ml) was added dropwise during 1 hour. After 6 hours, the reaction was complete and the solvent was evaporated. The residue was dissolved in CH<sub>2</sub>Cl<sub>2</sub> (300 ml) and washed with a 20% NaOH-solution (2 x 50 ml) and water (2 x 50 ml). The organic phase was dried, filtrated and evaporated to give a yellow liquid. Purification was done using flash chromatography with MeOH/CH<sub>2</sub>Cl<sub>2</sub> (1:9) as eluent to give a brown oil in 70 % yield. **Yield:** 70% (271 mg); **Formula:** C<sub>12</sub>H<sub>13</sub>N; **MW:** 276.15 g/mol.

### Synthesis of N-cyclopropylbenzylamine

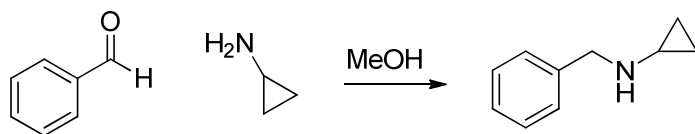

Benzaldehyde (500 mg, 4.71 mmol, 1 equiv.) was dissolved in MeOH and cyclopropylamine (326 µL, 4.71 mmol, 1 equiv.) was added. After 15 min of stirring at room temperature, the solution was cooled to 0° C and NaBH<sub>4</sub> (1 eq.) was added portionwise. After 2 h the reaction was complete and the solvent was evaporated. The residue was dissolved in CH<sub>2</sub>Cl<sub>2</sub> and washed with water and brine, dried with MgSO<sub>4</sub> and the solvent was evaporated *in vacuo* to obtain a yellow oil. The oil was dissolved in 1 N HCl and lyophilized to obtain the product as a white powder in 82% yield. **Yield:** 82% (569 mg); **Formula:** C<sub>10</sub>H<sub>13</sub>N; **MW:** 147.22 g/mol.

### Synthesis of N-cyclopropyl-3',5'-bis(trifluoromethyl)benzylamine

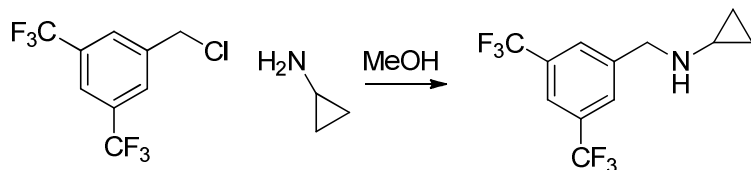

Cyclopropylamine (1.32 ml, 19.0 mmol, 10 equiv.) was dissolved in MeOH and the solution was heated to 50 °C. 3,5-Bis(trifluoromethyl)benzyl chloride (500 mg, 1.90 mmol, 1 equiv.) was dissolved in MeOH and added dropwise to reaction mixture. After 4 h the solvent was evaporated, the residue was dissolved in CH<sub>2</sub>Cl<sub>2</sub> and washed twice with 20% NaOH, H<sub>2</sub>O and brine. The organic layer was dried with MgSO<sub>4</sub> and evaporated to give a yellow oil, which was purified on flash chromatography using CH<sub>2</sub>Cl<sub>2</sub>/DIPEA (99:1) as eluent. The product was lyophilized in 1 N HCl to obtain the product as a yellow powder in 55% yield. **Yield:** 55% (243 mg); **Formula:** C<sub>12</sub>H<sub>11</sub>F<sub>6</sub>N; **MW:** 283.21 g/mol.
